# Supplementary material for: Facile synthesis of Cu–Ag hybrid nanowires with strong surface-enhanced Raman scattering sensitivity
Source: Royal Society of Chemistry journal article supplement (doi:10.1039/c5ce02221e), 2016-01-01
Supplement: c5ce02221e1.pdf [file c5ce02221e1.pdf]

## **Electronic Supporting Information**

### **Facile Synthesis of Cu-Ag Hybrid Nanowires with Strong Surface-enhanced Raman Scattering Sensitivity**

Zhi Jiang, Yanhong Tian\*, Su Ding, Jiayue Wen, Chenxi Wang

State Key Laboratory of Advanced Welding and Joining, Harbin Institute of  
Technology, Harbin, China, 150001.

To whom correspondence should be addressed: [tianyh@hit.edu.cn](mailto:tianyh@hit.edu.cn)

4-ATP probe was used to verify the SERS activity of the Cu-Ag hybrid nanowires. Figure S3 demonstrates the SERS effect of as-synthesized Cu-Ag hybrid NWs. The Raman spectrum of 4-ATP on as-synthesized Cu-Ag hybrid NWs exhibited four  $b_2$  modes at 1577, 1430, 1381, and 1145  $\text{cm}^{-1}$  and one  $a_1$  mode at 1080  $\text{cm}^{-1}$ , which is quite similar to those of 4-ATP absorbed on Ag nanoparticles [1]. Compared to the spectrum obtained in the solid, the SERS spectrum obtained on the Cu-Ag hybrid NWs film shows distinct frequency shifts with significant changes in band intensity. The  $\nu_{\text{CS}}$  band shifted from 1092  $\text{cm}^{-1}$  to 1080  $\text{cm}^{-1}$ , and another frequency shift from 1598  $\text{cm}^{-1}$  to 1577  $\text{cm}^{-1}$  was also observed, which was caused by the formation of strong Ag-S bonds between 4-ATP and Ag NPs [1].

The enhancement factor (EF) of the Cu-Ag hybrid nanowires on the R6G and 4-ATP molecules as calculated by the following equations.

$$EF = \frac{I_{\text{SERS}}}{I_{\text{BULK}}} \times \frac{N_{\text{BULK}}}{N_{\text{SERS}}} \quad \text{equation S1}$$

Where  $I_{\text{SERS}}$ ,  $I_{\text{BULK}}$  are integrated intensities of the peak of R6G at 1650  $\text{cm}^{-1}$  and that of 4-ATP at 1145  $\text{cm}^{-1}$ , and  $N_{\text{BULK}}$ ,  $N_{\text{SERS}}$  represent the molecule numbers of the solid R6G and surface-adsorbed molecules exposed to the laser illumination, respectively [2]. Under the estimation that R6G and 4-ATP was uniformly distributed on the surface of substrate, EF was estimated to be  $5.6 \times 10^5$  and  $4.5 \times 10^6$  for R6G and 4-ATP probes, respectively.

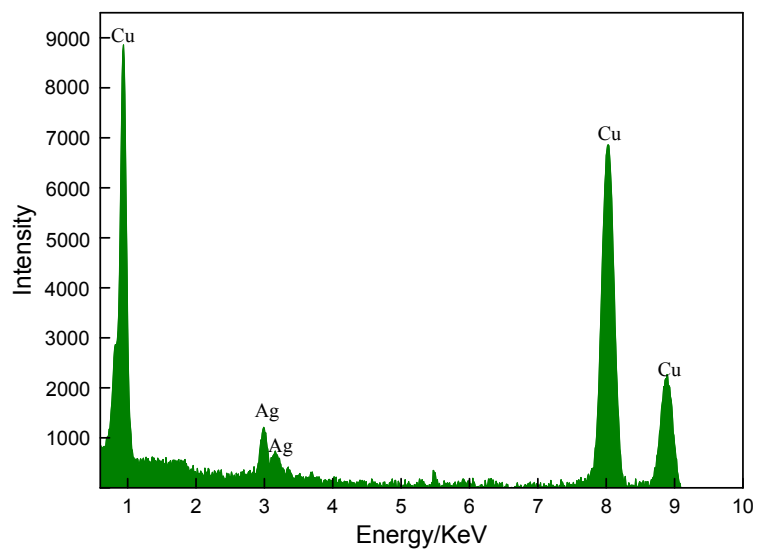

Figure S1 EDS analysis of Cu-Ag hybrid NWs in figure 2

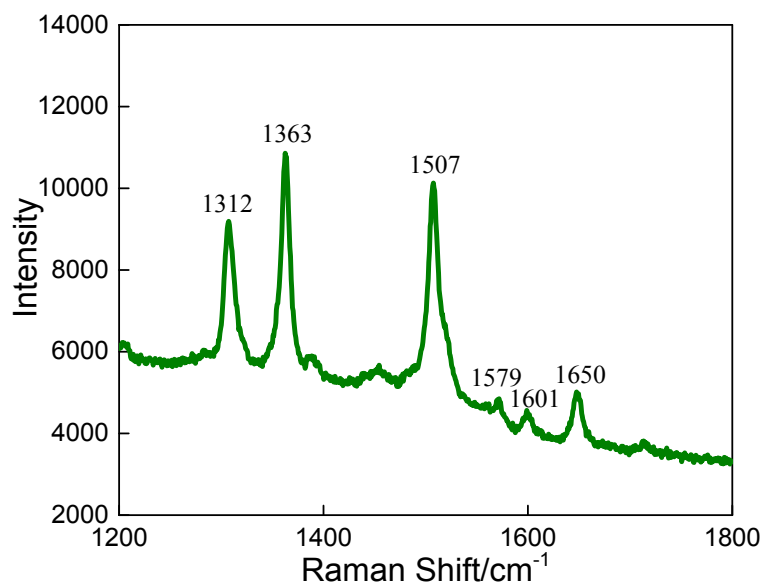

Figure S3 Raman spectra of R6G powder

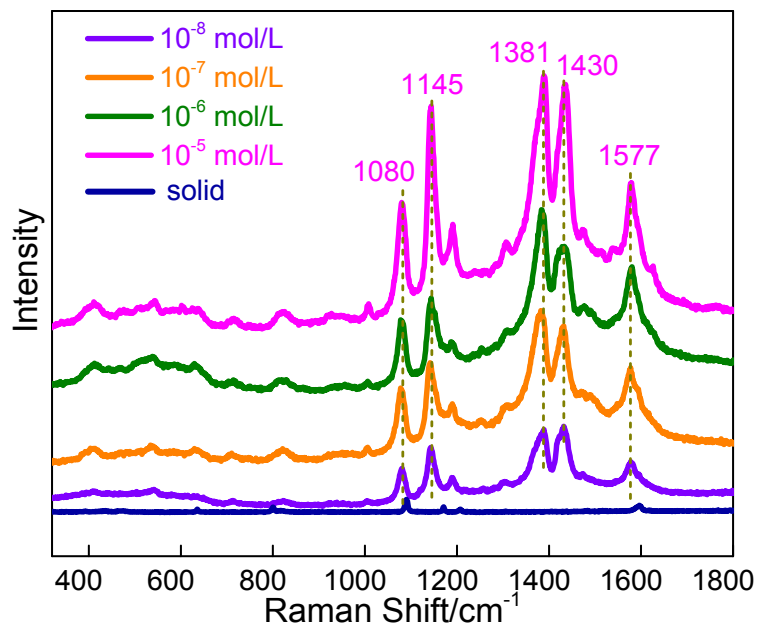

Figure S2 Raman Spectra of solid 4-ATP powder and 4-ATP ethanol solution with a series of concentration.

Reference:

- [1] L. Wang, H. Li, J. Tian and X. Sun, ACS Appl. Mater. Interfaces, 2010, 2, 2987-2991.
- [2] R. Ferrando, J. Jellinek and R. L. Johnston, Chem. Rev., 2008, 108, 845–910.
